# Supplementary material for: Pulmonary MTBVAC vaccination induces immune signatures previously correlated with prevention of tuberculosis infection
Source: PubMed Central journal article supplement — Cell Rep Med. 2021 Jan 19;2(1):100187. doi: 10.1016/j.xcrm.2020.100187 (PMC7817873; doi:10.1016/j.xcrm.2020.100187), 2021-01-19
Supplement: mmc1.pdf [file mmc1.pdf]

**Cell Reports Medicine, Volume 2**

**Supplemental Information**

**Pulmonary MTBVAC vaccination induces  
immune signatures previously correlated  
with prevention of tuberculosis infection**

**Karin Dijkman, Nacho Aguilo, Charelle Boot, Sam O. Hofman, Claudia C. Sombroek, Richard A.W. Vervenne, Clemens H.M. Kocken, Dessislava Marinova, Jelle Thole, Esteban Rodríguez, Michel P.M. Vierboom, Krista G. Haanstra, Eugenia Puentes, Carlos Martin, and Frank A.W. Verreck**

**Supplemental Figure 1: Serum C-reactive protein levels post vaccination (Relating to Figure 1)**

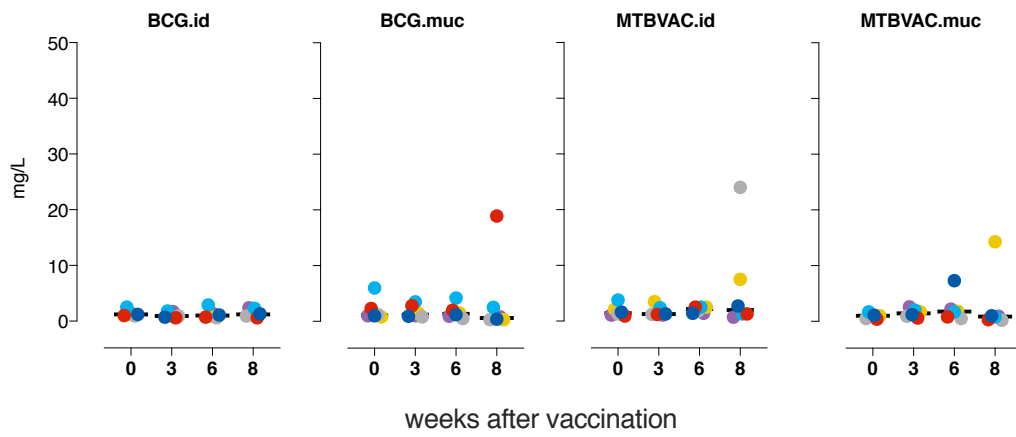

Levels of C-reactive protein did not reveal any adverse systemic inflammatory response after vaccination. Individual CRP values are plotted per treatment group over time, with horizontal bars indicating medians.

**Supplemental Figure 2: BAL CD8+ T-cell responses and proliferation, and bronchoalveolar lymph node CD4+ T-cell responses (Relating to Figure 2)**

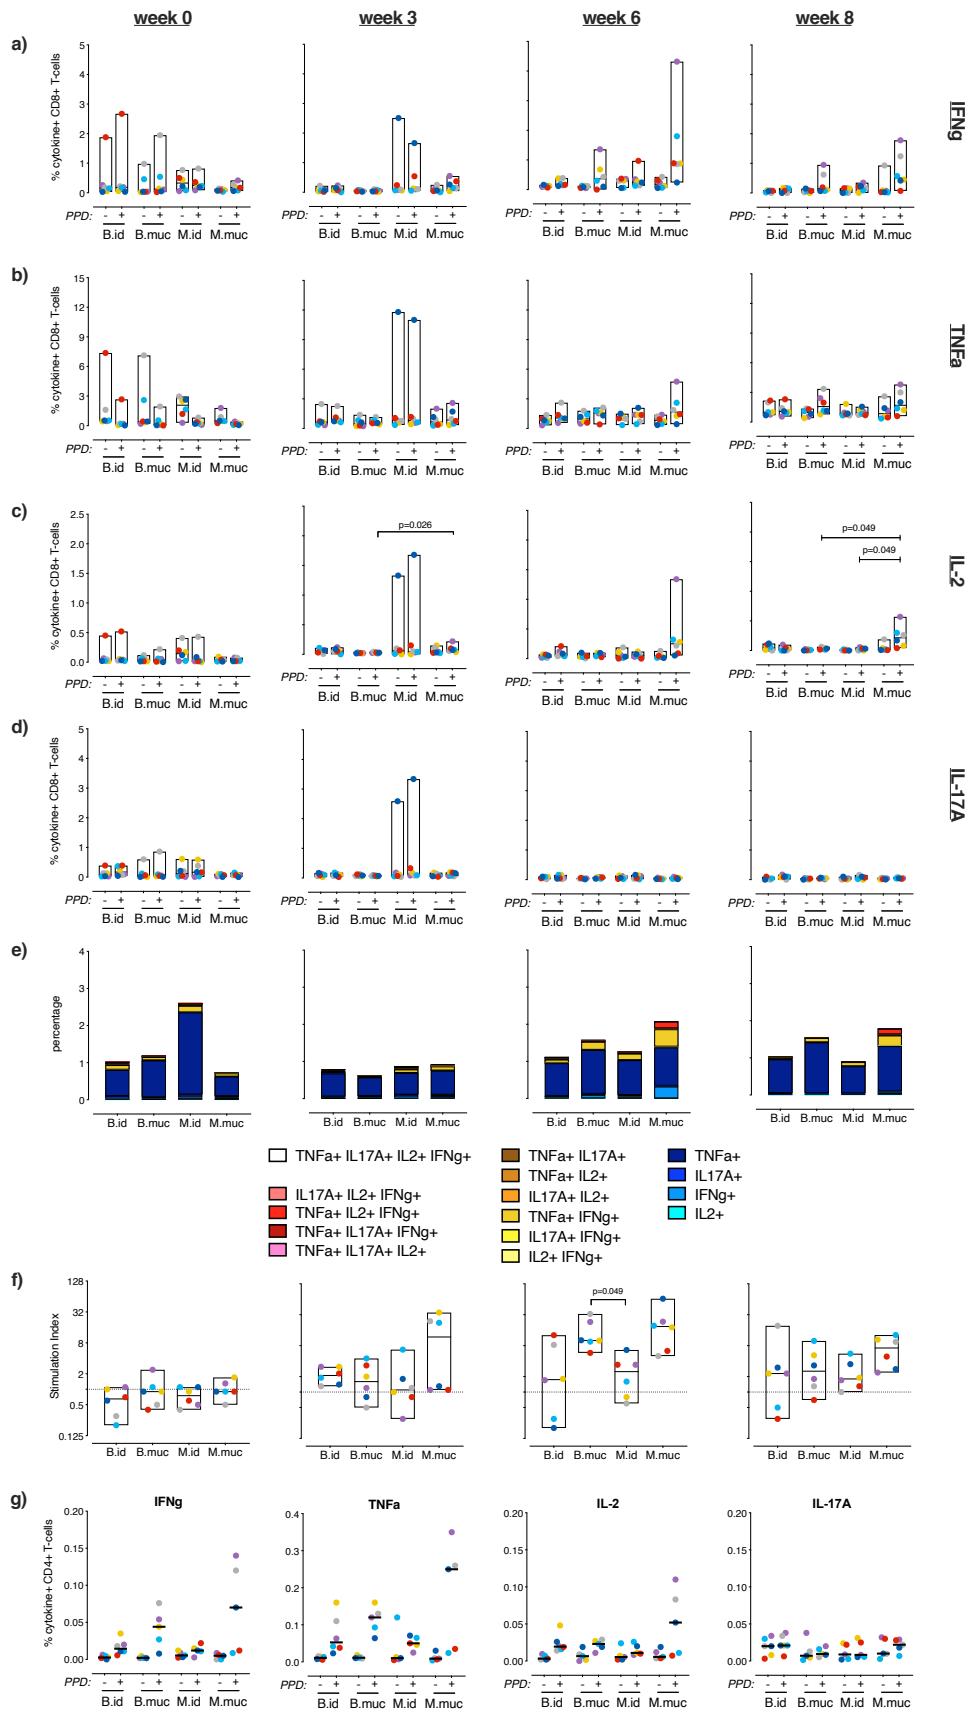

---

Flow cytometric analysis of **a)** IFN $\gamma$ , **b)** TNF $\alpha$ , **c)** IL2 and **d)** IL17A responses in CD8<sup>+</sup> T-cells **before and at various time points** after vaccination, **either or not upon *in vitro* recall stimulation with PPD**. **e)** Stacked bar graphs depicting frequencies of single and multiple cytokine producing subsets of CD8<sup>+</sup> T-cells after PPD stimulation by median values. **f)** PPD-specific proliferation of BAL cells, depicted as the stimulation index: the ratio of antigen- over medium control-stimulated values. **g)** Production of IFN $\gamma$ , TNF $\alpha$ , IL2 and IL17A by CD4<sup>+</sup> T-cells from lung draining lymph nodes **either or not in response to PPD**, 8 weeks after vaccination.

In **a-d** and **g** “+” indicates PPD stimulated samples; “-” indicates unstimulated, culture medium-incubated samples as controls. For all graphs n=6 animals per group. Horizontal lines in bars indicate group medians. Significance of group differences was determined by two-sided Mann-Whitney test adjusted for multiple comparisons. Holms adjusted p-values  $\leq 0.05$  are depicted. Colour coding per individual is consistent throughout the paper including supplementals.

**Supplemental Figure 3: Cytokine production by peripheral CD4+ T-cells (Relating to Figure 3)**

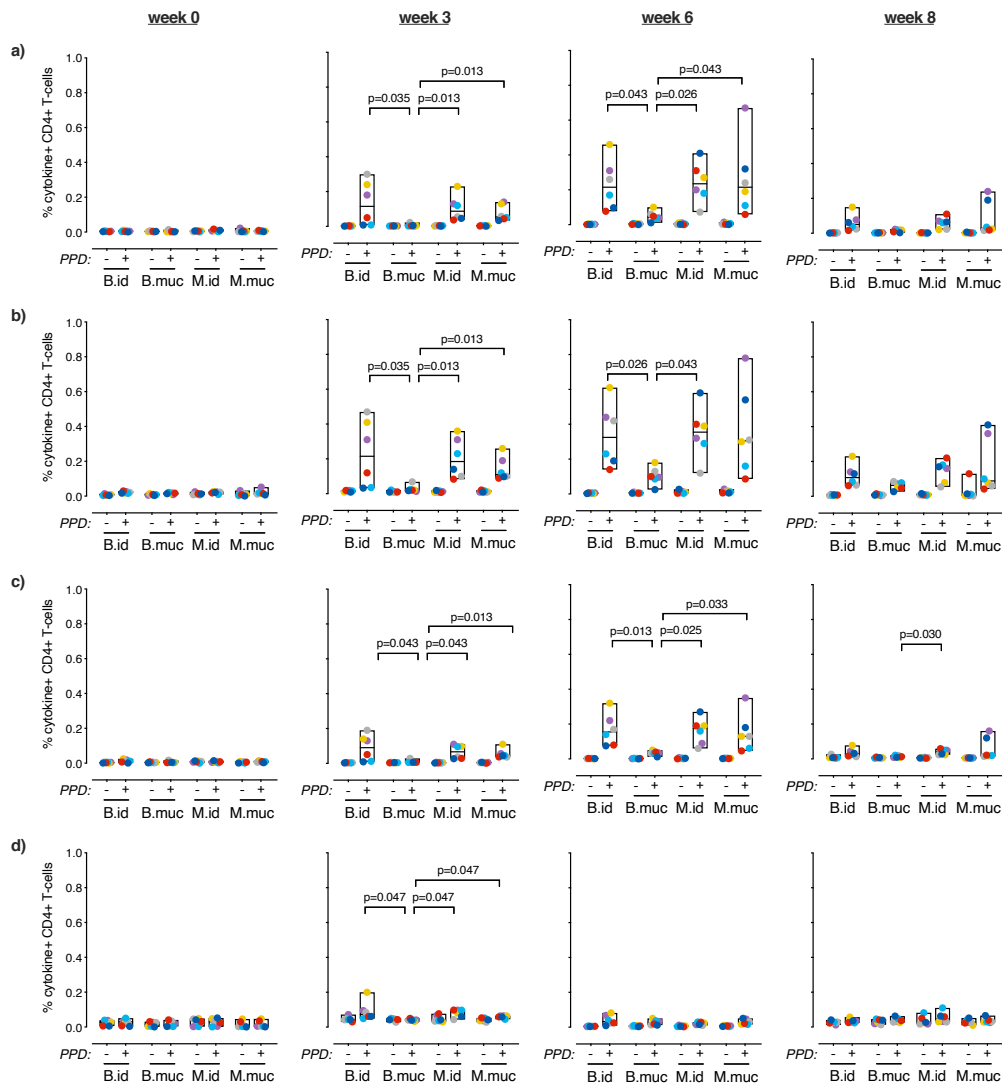

Production of **a) IFN $\gamma$** , **b) TNF $\alpha$** , **c) IL2** and **d) IL17A** by peripheral CD4+ T-cells before and at various time points after vaccination, either or not upon *in vitro* recall stimulation with PPD.

PPD stimulated samples are indicated by “+”, “-” indicates unstimulated, culture medium control samples. For all graphs n=6 animals per group. Horizontal lines indicate group medians. Significance of group differences was determined by two-sided Mann-Whitney test adjusted for multiple comparisons. Holms adjusted p-values  $\leq 0.05$  are depicted. Colour coding per individual is consistent throughout.

**Supplemental Figure 4: Cytokine production by peripheral CD8+ T-cells (Relating to Figure 3)**

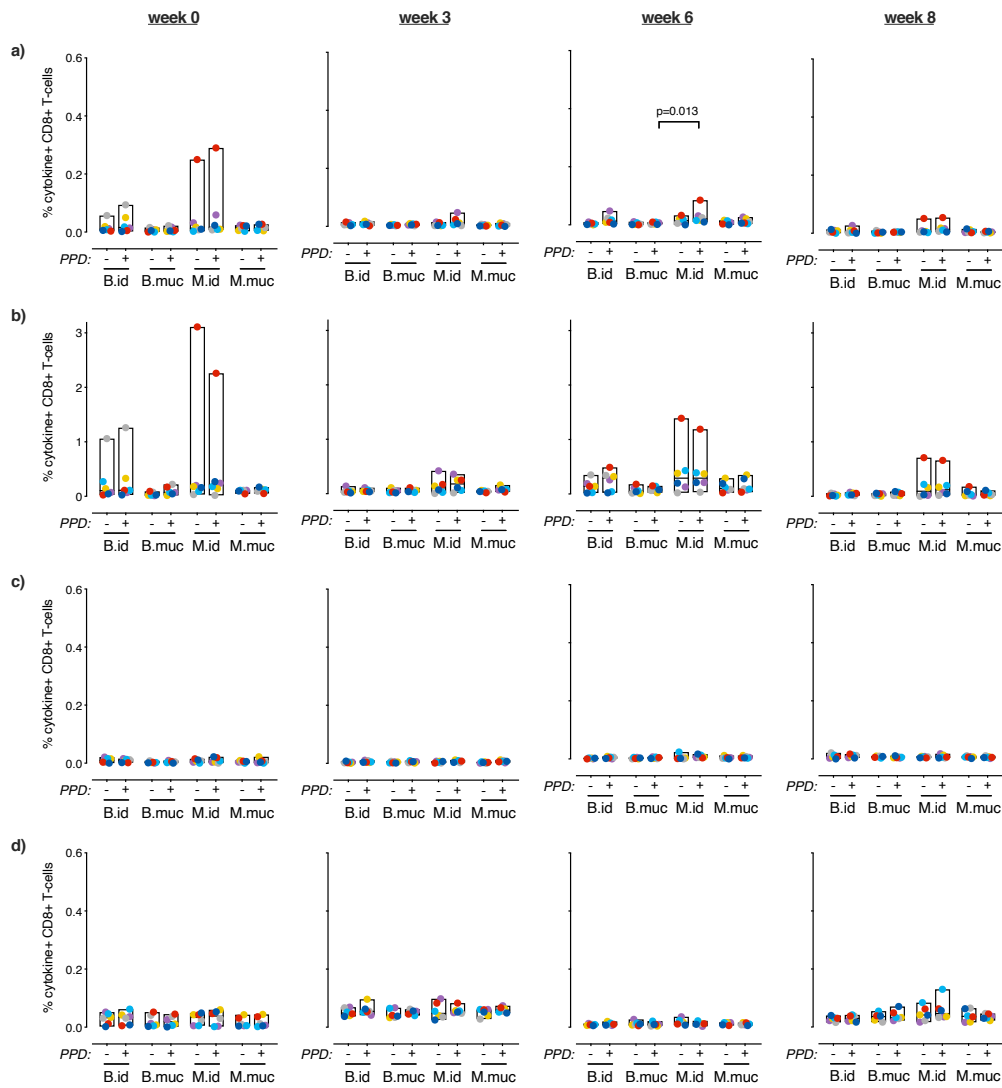

Production of **a) IFN $\gamma$** , **b) TNF $\alpha$** , **c) IL2** and **d) IL17A** by peripheral CD8+ T-cells before and at various time points after vaccination, either or not upon *in vitro* recall stimulation with PPD.

PPD stimulated samples are indicated by “+”, “-” indicates unstimulated, culture medium control samples. For all graphs n=6 animals per group. Horizontal lines indicate group medians. Significance of group differences was determined by two-sided Mann-Whitney test adjusted for multiple comparisons. Holms adjusted p-values  $\leq 0.05$  are depicted. Colour coding per individual is consistent throughout.

**Supplemental Figure 5: Cytokine production by CD4+ T-cells in TST-DTH draining lymph nodes**  
(Relating to Figure 3)

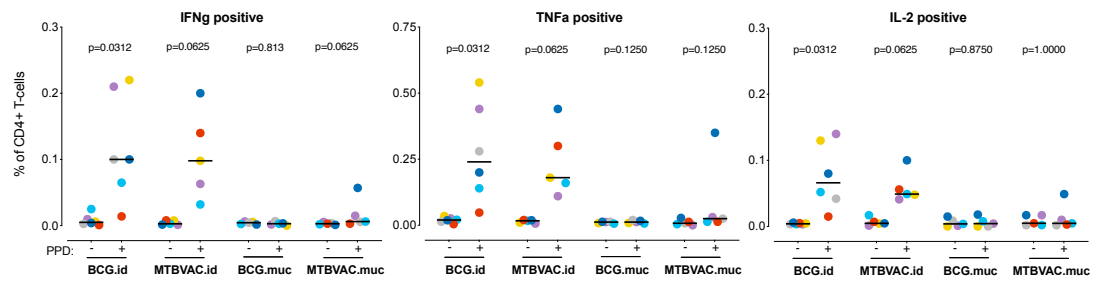

Production of IFN $\gamma$ , TNF $\alpha$ , and IL2 by CD4+ T-cells in axillar lymph nodes draining [the injection site of the diagnostic Tuberculin Skin Test \(TST\)](#), which was applied at week 8 after vaccination to investigate if mucosal vaccine routing would result in a distinctive T-cell response after *in vivo* recall stimulation.

For all graphs n=5 animals per group, except for BCG.id (n=6). Horizontal lines indicate group medians. Significance of antigen-specific responses was determined by Wilcoxon matched pairs-signed rank testing. Colour coding per individual is consistent throughout.

**Supplemental Figure 6: Homing marker expression by peripheral T-cells (Relating to Figure 4)**

PBMC

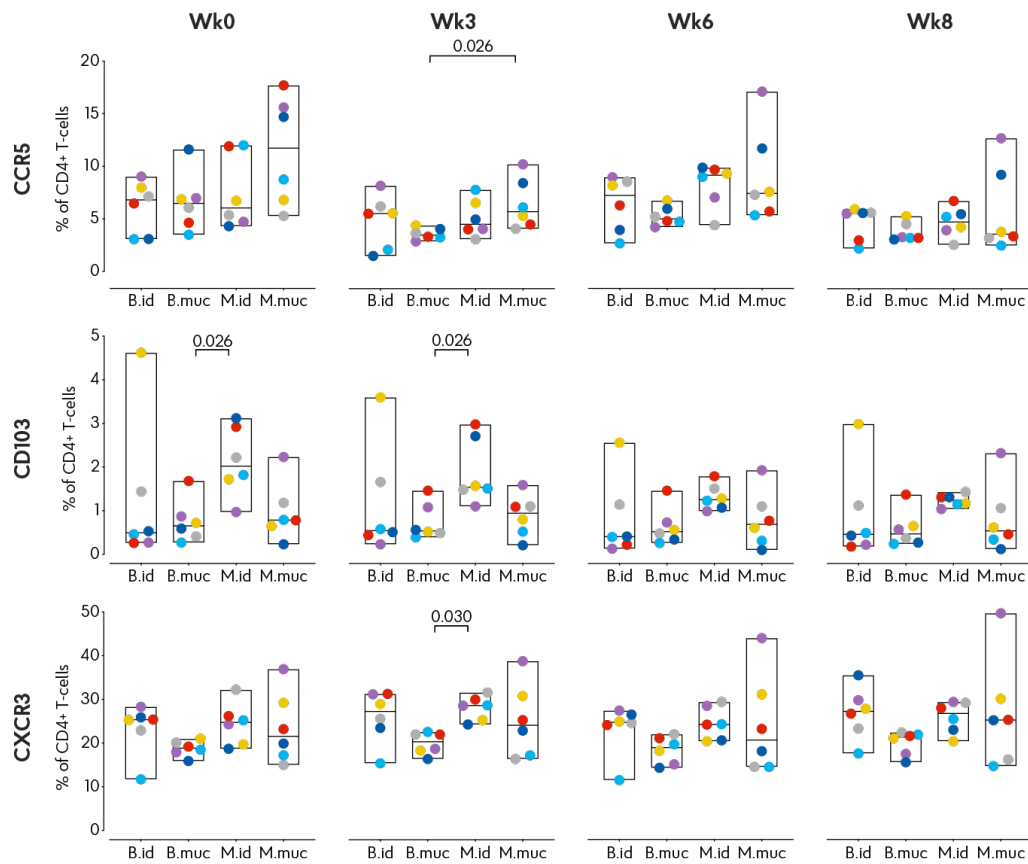

Frequency of CCR5+, CD103+ and CXCR3+ CD4+ T-cells in unstimulated peripheral blood mononuclear cells before and at various time points after vaccination.

For all graphs n=6 animals per group. Horizontal lines indicate group medians. Significance of group differences was determined by two-sided Mann-Whitney test adjusted for multiple comparisons. Holms adjusted p-values  $\leq 0.05$  are depicted. Colour coding per individual is consistent throughout.
